# Supplementary material
Source: publisher figshare collection journal article supplement (https://asha.figshare.com/ndownloader/files/24160412)
Supplement: Supplementary file 1 [file 24160412]

## Sheet: Sheet1
			Supplemental material, Holbrook & Israelsen, “Speech Prosody Interventions for Persons With Autism Spectrum Disorders: A Systematic Review,” AJSLP, https://doi.org/10.1044/2020_AJSLP-19-00127
			Supplemental Material S2. Coding master sheet.
Reviewer:
Citation:
Date completed:
			NOTES	Specific Instructions
Study Characteristics	Publication Type-
		Peer-reviewed Journal		Choose one
		Dissertation
	Study Design			Choose one and add any further specifications in the notes
		Experimental
		Quasi-experimental
		SSD
Setting		United States
	Location			Including country (if outside US)
	Intervention delivered at:			choose one, specify further in notes if needed
		Home
		School
		Clinical setting/University Lab
		Mixed
	Other setting details of note?			copy/paste from article, give comments, - this part won't be part of our reliability calculations (?)
Participants
	Total Sample size
	For experimental/quasi:			For experimental/quasi-experimental, please specify the numbers in each group and their defining characteristics
	Treatment Group (1)			Ex. n=10; ASD; Mark NA for SSD
	Treatment Group (2)			Ex: n=10; TD; Mark NA for SSD
	Control Group (Group 3)			Ex: an active control group, age matched/language ability matched, etc. - add rows if there are more than three groups.
	Age Range (over all)			Record means and SD (if reported);
	Group 1:			Give age ranges of each group in study; NA for SSD
	Group 2:			If the ages aren't specified, you can choose from the following: preschool, elementary/school-age, adolescent/middle-high school, adult, unclear/not reported
	Group 3:
	Sex (overall # of males/females)
	Group 1:
	Group 2:
	Group 3:
	IQ (if reported)			Include means and SD (if reported)
	Group 1:
	Group 2:
	Group 3:
	Verbal Ability			Choose one; give details as needed in notes
		Nonverbal
		Minimally verbal (1-2 word utterances)
		Verbally Fluent but disordered (language disorder/atypical)
		Verbally Fluent, not disordered
		Not reported/unclear
	Primary Language	Not reported/unclear		Specify primary language of participants; if different from participants, specify language of interventionists and caregivers
	Race/Ethnicity (if reported)			If not reported, write NA
	Family history of ASD reported?
		Yes		If yes, please copy/paste description in notes
		No
		Unclear
	SES
		Low		Select as many as apply; specify in notes if there are differences in SES between groups/participants
		Low-middle
		Middle
		Middle-upper
		Upper
		Not reported/unclear
	ASD Diagnosis Source
		Educational/school-based
		Medical/Psychologist
		Other
		Not reported/unclear
	Diagnosis Instrument	Not reported/unclear
		ADOS
		DISCO
		3Di
		SRS-ASD
		SCQ
	Comorbidities?			If yes, please copy/paste description in notes
		Yes		Examples include ADHD, Intellectual deficit, OCD, etc.
		No
		Unclear
	Participant Intervention History			Select all that apply; add details in the notes as needed
		Speech-language therapy
		Behavioral Interventions
		Special Education
		Not reported/unclear
		Other
	Other participant characteristics of note?		All 3 participants were either in the later stages of 4 year degrees or had graduated.	Copy/paste anything else that might be relevant. This section will not be included in reliability
Intervention Conditions
	Prosody primary goal?			Was prosody improvement the primary goal of intervention? If not, please specify what was the primary goal in the notes
		Yes
		No
		Not reported/unclear
	Session:
	Total # of sessions
	Length of sessions
	Number of sessions per week
	Duration of intervention (in months)
	Type of session:
		Individual
		Group
		Mixed/Other
		Not reported/unclear
	Intervention name reported
		Yes (please specify)
		No
	Description of Intervention			Please, copy/paste the paragraphs describing the key features of the intervention. When in doubt, include it. We can edit out details later as needed.
Outcome Measure(s)
	Prosody Outcome			How was the prosody outcome measured?
		Acoustic		ex. F0, pitch range, duration, etc. using instrumental programs
		Behavioral/rated by listener
		Both
	Description of Prosody Outcome			Copy/paste relevant descriptions in notes (ex. specific acoustic measures, description of rating scale); Again, more is better
	When was the prosody outcome measured?			copy/paste description of frequency of outcome measure collection in notes
	Inter/intra-rater (specify) reliability reported?
		Yes. Specific levels reported (give report)
		Yes. Reported as acceptable, but no specific levels reported
		No
		Not reported/unclear
	Fidelity reported?
		Yes		If yes, copy/paste description
		No
		Not reported/unclear
	Validity reported?
		Yes		If yes, copy/paste description
		No
		Not reported/unclear
Results	What were the results? (summarize)			Results / Summary, limitations of conclusions related to research question - copy/paste where possible/practical
	How were effect sizes reported?			Select one - For the SSD ones - I got the names of programs that extract the data from the graphs so that we can calculate Tau-U
		Tau-U		If no effect sizes were reported, copy/paste the info needed to calculate effect size (group --> M and SD; SSD --> graphs/tables
		PND		For the ones we need to calculate effect size one, we'll do a separate reliability check - it won't count toward our coding reliability -
		Cohen's d
		Other
		Not reported/unclear
	Missing data?			If yes, copy/paste description in notes
		Yes
		No
		Not reported/unclear
	Do authors claim causality of the intervention on the outcome?			If no or unclear, please explain
		Yes
		No
		Not reported/unclear
	If causality claimed, does the cause precede the outcome?			If no or unclear, please explain
		Yes
		No
		Not reported/unclear
	If causality claimed, does the cause covary with the outcome?			If no or unclear, please explain
		Yes
		No
		Not reported/unclear
	If causality claimed, are there any other explanations for the outcome?			If yes or unclear, explain in the notes
		Yes
		No
		Not reported/unclear
Quality Features adapted from Reichow et al. 2008 & Reichow 2011
Group Studies
Primary indicators
	Participant characteristics described in full (choose one)?
		High quality		1. Age and gender are provided for all participants (mean age is acceptable). 2. All participants’ diagnoses are operationalized by including the specific diagnosis and diagnostic instrument (acceptable instruments include ADOS, ADI-R, CARS, DSM-IV, and ICD-10) used to make the diagnosis or an operational definition of behaviors and symptoms of the participants. 3. Information on the characterist…
		Acceptable quality		Study meets 3 of the 4 criteria Study meets 3 of the 4 criteria (or 2/3 if the there were no standardized tests used)
		Unacceptable quality		Doesn't at least meet 3 of the 4 criteria
	Independent variable was described with replicable precision?
		High quality		An H rating is awarded to a study that defines independent variables with replicable precision (i.e., one could reproduce the intervention given the description provided). If a manual is used, the study passes this criterion.
		Acceptable quality		An A rating is awarded to a study that defines many elements of the independent variable but omits specific details.
		Unacceptable quality		A U rating is awarded to a study that does not sufficiently define the independent variables.
	Comparison condition described with replicable precision?
		High quality		An H rating is awarded to a study that defines the conditions for the comparison group with replicable precision, including a description of any other interventions participants receive.
		Acceptable quality		An A rating is awarded to a study that vaguely describes the conditions for the comparison group; information on other interventions may not be reported
		Unacceptable quality		A U rating is awarded to a study that does not report the conditions for the comparison group or has no control or comparison group.
	Dependent measure(s) described adequately (see Reichow).
		High quality		An H rating is awarded to a study that meets the following criteria: ● The variables are defined with operational precision. ● The details necessary to replicate the measures are provided. ● The measures are linked to the dependent variables. ● The measurement data is collected at appropriate times during the study for the analysis being conducted.
		Acceptable quality		An A rating is awarded to a study that meets three of the four criteria.
		Unacceptable quality		A U rating is awarded to a study that meets fewer criteria
	Link between research questions and data analysis?
		High quality		An H rating is awarded to a study in which data analysis is strongly linked to the research questions and uses correct units of measure (i.e., child level, teacher level, etc.) on all variables.
		Acceptable quality		An A rating is awarded to a study in which data analysis is poorly linked to the research questions but uses correct units for a majority of the outcome measures.
		Unacceptable quality		A U rating is awarded to a study in which data analysis is linked weakly or not at all to the research questions and uses the correct unit for only a minority of the outcome measures
	Appropriate use of statistical tests?
		High quality		An H rating is awarded to a study in which proper statistical analyses were conducted with an adequate power and sample size (n>10) for each statistical measure.
		Acceptable quality		An A rating is awarded to a study in which proper statistical analyses were conducted for at least 75% of the outcome measures or in which proper statistical analyses were conducted on 100% of outcome measures but with inadequate power or a small sample size.
		Unacceptable quality		A U rating is awarded to a study in which statistical analysis was not done correctly, the sample size was too small or the power was inadequate.
Secondary indicators
	Random assignment to groups?
		Evidence		This indicator is positive if participants are assigned to groups using a random assignment procedure.
		No evidence
	Adequate interobserver agreement?
		Evidence		This indicator is positive if IOA is collected across all conditions, raters, and participants with reliability >.80 (Kappa >.60) or psychometric properties of standardized tests are reported and are >.70 agreement with a Kappa >.40.
		No evidence
	Raters blind to treatment condition?
		Evidence		This indicator is positive if raters are blind to the treatment condition of the participants.
		No evidence
	Adequate fidelity of implementation?
		Evidence		This indicator is positive if treatment or procedural fidelity is continuously assessed across participants, conditions, and implementers, and if applicable, has measurement statistics >.80.
		No evidence
	Attrition was comparable between groups and less than 30% of final measure
		Evidence		This indicator is positive if attrition is comparable (does not differ between groups by more than 25%) across conditions and less than 30% at the final outcome measure.
		No evidence
	Generalization and/or maintenance measured?
		Evidence		This indicator is positive if outcome measures are collected after the final data collection to assess generalization or maintenance.
		No evidence
	Effect sizes adequate?
		Evidence		This indicator is positive if effect sizes are reported for at least 75% of the outcome measures and are >.40.
		No evidence
	Social validity adequately reported (See Reichow)?
		Evidence		Social Validity (SV) This indicator is positive if the study contains at least four of the following features: ● Socially important DVs (i.e., society would value the changes in outcome of the study) ● Time- and cost-effective intervention (i.e., the ends justify the means) ● Comparisons between individuals with and without disabilities ● A behavioral change that is large enough for practical val…
		No evidence
Single Subject
Primary indicators
	Participant characteristics described in full (choose one)?
		High quality		1. Age and gender are provided for all participants (mean age is acceptable). 2. All participants’ diagnoses are operationalized by including the specific diagnosis and diagnostic instrument (acceptable instruments include ADOS, ADI-R, CARS, DSM-IV, and ICD-10) used to make the diagnosis or an operational definition of behaviors and symptoms of the participants. 3. Information on the characterist…
		Acceptable quality		Study meets 3 of the 4 criteria (or 2/3 if the there were no standardized tests used)
		Unacceptable quality		Doesn't at least meet at least 3 of the 4 criteria
	Independent variable was described with replicable precision?
		High quality		An H rating is awarded to a study that defines independent variables with replicable precision (i.e., you could reproduce the intervention given the description provided). If a manual is used, the study passes this criterion.
		Acceptable quality		An A rating is awarded to a study that defines many elements of the independent variable but omits specific details.
		Unacceptable quality		A U rating is awarded to a study that does not sufficiently define the independent variables.
	Dependent variable described adequately (see Reichow).
		High quality		An H rating is awarded to a study that meets the following criteria: ●● The variables are defined with operational precision. ●● The details necessary to replicate the measures are provided. ●● The measures are linked to the dependent variables. ●● The measurement data is collected at appropriate times during the study for the analysis being conducted.
		Acceptable quality		An A rating is awarded to a study that meets three of the four criteria.
		Unacceptable quality		A U rating is awarded to a study that meets fewer criteria.
	Baseline condition had at least three points, appeared to be stable, had no trend or a counter therapeutic trend, and operationally defined with replicable precision?
		High quality		An H rating is awarded to a study in which 100% of baselines: ●● Encompass at least three measurement points ●● Appear through visual analysis to be stable ●● Have no trend or a counter-therapeutic trend ●● Have conditions that are operationally defined with replicable precision
		Acceptable quality		An A rating is awarded to a study in which at least one of the above criteria was not met in at least one, but not more than 50%, of the baselines.
		Unacceptable quality		A U rating is awarded to a study in which two or more of the above criteria were not met in at least one baseline or more than 50% of the baselines do not meet three of the criteria.
	Visual analysis revealed adequate reporting (see Reichow)?
		High quality		An H rating is awarded to a study in which 100% of graphs (i.e., tiers within a figure): ●● Have data that are stable (level or trend) ●● Contain less than 25% overlap of data points between adjacent conditions, unless behavior is at ceiling or floor levels in the previous condition ●● Show a large shift in level or trend between adjacent conditions that coincide with the implementation or remova…
		Acceptable quality		An A rating is awarded to a study in which two of the criteria were met on at least 66% of the graphs.
		Unacceptable quality		A U rating is awarded to a study in which two or fewer criteria were met on less than 66% of the graphs.
	Experimental control demonstrated (see Reichow)?
		High quality		An H rating is awarded to a study that contains at least three demonstrations of the experimental effect, occurring at three different points in time and changes in the DVs vary with the manipulation of the IV in all instances of replication. If there was a delay in change at the manipulation of the IV, the study is accepted as high quality if the delay was similar across different conditions or …
		Acceptable quality		An A rating is awarded to a study in which at least 50% of the demonstrations of the experimental effect meet the above criteria, there are two demonstrations of the experimental effect at two different points in time and changes in the DVs vary with the manipulation of the IV.
		Unacceptable quality		A U rating is awarded to a study in which less than 50% of the demonstrations of the experimental effect meet the above criteria, there are fewer than two demonstrations of the experimental effect occurring at two different points in which changes in the DVs vary with the manipulation of the IV.
Secondary indicators
	Interobserver agreement collected for 20% of all sessions across raters, conditions, participants. IOA ≥ .80
		Evidence		This indicator is positive if IOA is collected across all conditions, raters, and participants with reliability >.80.
		No evidence
	Kappa was calculated on at least 20% of sessions across raters, conditions, participants. Kappa ≥ .60
		Evidence		This indicator is positive if Kappa is calculated on at least 20% of sessions across all conditions, raters, and participants with a score >.60.
		No evidence
	Fidelity continuously assess across participants, conditions, and implementers. Reliability ≥ .80.
		Evidence		This indicator is positive if treatment or procedural fidelity is continuously assessed across participants, conditions, and implementers, and if applicable, has measurement statistics >.80.
		No evidence
	Raters blind to treatment condition of participants?
		Evidence		This indicator is positive if raters are blind to the treatment condition of the participants.
		No evidence
	Generalization and/or maintenance measured?
		Evidence		This indicator is positive if outcome measures are collected after the final data collection to assess generalization or maintenance.
		No evidence
	Social validity described?
		Evidence		This indicator is positive if the study contains at least four of the following features: ●● Socially important DVs (i.e., society would value the changes in outcome of the study) ●● Time- and cost-effective intervention (i.e., the ends justify the means) ●● Comparisons between individuals with and without disabilities ●● A behavioral change that is large enough for practical value (i.e., it is c…
		No evidence
